1

2 **Perchlorate-Specific Proteomic Stress Responses of *Debaryomyces***  
3 ***hansenii* Could Enable Microbial Survival in Martian Brines**

4

5 Jacob Heinz<sup>a\*</sup>, Joerg Doellinger<sup>b</sup>, Deborah Maus<sup>c</sup>, Andy Schneider<sup>b</sup>, Peter Lasch<sup>b</sup>, Hans-Peter  
6 Grossart<sup>d,e</sup>, Dirk Schulze-Makuch<sup>a,d,f,g</sup>

7 <sup>a</sup>Zentrum für Astronomie und Astrophysik (ZAA), AG Astrobiologie, Technische Universität Berlin, 10623  
8 Berlin, Germany;

9 <sup>b</sup>Robert Koch-Institute, Centre for Biological Threats and Special Pathogens, Proteomics and Spectroscopy  
10 (ZBS6), 13353 Berlin, Germany;

11 <sup>c</sup>Robert Koch-Institute, Centre for Biological Threats and Special Pathogens, Metabolism of Microbial  
12 Pathogens (NG2), 13353 Berlin, Germany;

13 <sup>d</sup>Department of Plankton and Microbial Ecology, Leibniz-Institute of Freshwater Ecology and Inland  
14 Fisheries (IGB), 16775 Stechlin, Germany;

15 <sup>e</sup>Institute for Biochemistry and Biology, Potsdam University, 14476 Potsdam, Germany;

16 <sup>f</sup>GFZ German Research Center for Geosciences, Section Geomicrobiology, 14473 Potsdam, Germany;

17 <sup>g</sup>School of the Environment, Washington State University, Pullman, 99163 Washington, USA.

18

19 \*Correspondence: [heinz@tu-berlin.de](mailto:heinz@tu-berlin.de)

20

## 21 **Abstract**

22 If life exists on Mars, it would face several challenges including the presence of perchlorates, which  
23 destabilize biomacromolecules by inducing chaotropic stress. However, little is known about  
24 perchlorate toxicity for microorganism on the cellular level. Here we present the first proteomic  
25 investigation on the perchlorate-specific stress responses of the halotolerant yeast *Debaryomyces*  
26 *hansenii* and compare these to generally known salt stress adaptations. We found that the  
27 responses to NaCl and NaClO<sub>4</sub>-induced stresses share many common metabolic features, e.g.,  
28 signaling pathways, elevated energy metabolism, or osmolyte biosynthesis. However, several new  
29 perchlorate-specific stress responses could be identified, such as protein glycosylation and cell  
30 wall remodulations, presumably in order to stabilize protein structures and the cell envelope. These  
31 stress responses would also be relevant for life on Mars, which - given the environmental conditions  
32 - likely developed chaotropic defense strategies such as stabilized conformations of  
33 biomacromolecules and the formation of cell clusters.

34 **Keywords:** salt tolerance, chaotropicity, cell wall, glycosylation, Mars.

35

## 36 **Introduction**

37

38 Life as we know it requires energy as well as access to CHNOPS (carbon, hydrogen, nitrogen,  
39 oxygen, phosphorus, sulfur), trace elements, and liquid water. On Mars, energy would be provided  
40 to putative life chemically or via sunlight, carbon is accessible through the thin but CO<sub>2</sub>-rich  
41 atmosphere, and other essential elements are abundant in the regolith (1). Availability of liquid  
42 water, however, is strongly restricted due to the low atmospheric pressure of approx. 6 mbar and  
43 mostly subzero temperatures on Mars (2). One of the few possibilities to generate liquid water in  
44 the Martian near surface is the formation of temporarily stable brines via deliquescence, a process  
45 in which a hygroscopic salt absorbs water from the atmosphere and dissolves within that water (2).  
46 It has been shown that deliquescent water is sufficient to drive the metabolism of halotolerant  
47 methanogenic archaea (3). Intriguingly, several hygroscopic salts have been detected on Mars (4).  
48 Among those are very deliquescent and freezing point depressing perchlorates (ClO<sub>4</sub><sup>-</sup>), which are  
49 widely distributed on the Martian surface (5) but appear in natural environments on Earth only  
50 occasionally in hyperarid deserts (6, 7).

51 Brines formed via deliquescence provide diverse challenges for microbial life. High salt  
52 concentrations lead to osmotic stress and reduce water activity, which is a measure for the amount  
53 of unbound water molecules in a solution available for biological processes (8). Furthermore, salts  
54 can induce ion-specific stresses like interferences with the cell's metabolism or changes in cell

55 permeability through variations in ionic hydration shells (9). Some anions like perchlorate  
56 additionally evoke chaotropic stress (10), i.e., they destabilize biomacromolecules like proteins,  
57 presumably through nonlocalized attractive dispersion forces (11). In *Pseudomonas putida*, it has  
58 been shown that chaotropic solute-induced water stress mainly leads to upregulation of proteins  
59 involved in stabilization of biological macromolecules and membrane structure (12). However,  
60 detailed research on microbial responses to perchlorate-induced chaotropic stress is still lacking.

61 Here, we present a proteomic study investigating the perchlorate-specific stress response on  
62 *Debaryomyces hansenii* to evaluate the physiological adaptations required for microorganisms to  
63 thrive in the Martian near surface. The halotolerant yeast *D. hansenii* has been chosen as a model  
64 organism as it has been described earlier to tolerate the highest perchlorate concentrations  
65 reported to date (13, 14). This yeast provides a large metabolic toolset to counteract salt stress,  
66 such as the high-osmolarity glycerol (HOG) pathway which enables stress signaling and  
67 concomitant biosynthesis of the osmoprotectant glycerol (15). Its close relation to the intensively  
68 studied bakery yeast *Saccharomyces cerevisiae* greatly facilitates the annotation of proteins and  
69 thus prediction of their functions. For the investigation of the proteome of *D. hansenii*, we choose  
70 a recently developed proteomics protocol called SPEED (Sample Preparation by Easy Extraction  
71 and Digestion) which enables sample-type independent deep proteome profiling with high  
72 quantitative accuracy and precision (16, 17).

73 This is the first study investigating perchlorate-specific stress responses (i.e., with a significant  
74 distinction compared to general salt stress) with an untargeted proteomic approach to provide  
75 novel and fundamental understanding of the required cellular adaptation mechanisms for life in  
76 perchlorate-rich, chaotropic habitats on Earth, Mars, and beyond.

77

## 78 **Results**

79

80 In order to distinguish the perchlorate-specific stress response of *D. hansenii* from general osmotic  
81 and salt stress responses proteomes of cell cultures containing either NaClO<sub>4</sub>, NaCl or no additional  
82 salts in growth medium DSMZ #90 were analyzed. Two different stress regimes were investigated  
83 (Fig. 1). At moderate salt stress (1.5 m NaClO<sub>4</sub> and 2.4 m NaCl, with m = molality [mol/kg]), growth  
84 media were inoculated with a salt-free culture to provoke a salt shock response. Cell growth at high  
85 salt stress conditions (2.4 m NaClO<sub>4</sub> and 3.9 m NaCl) could only be enabled by long-term adaption  
86 of cells to stepwise increasing salt concentrations (Fig.1). All samples were prepared as biological  
87 triplicates and cells were harvested in the late exponential growth phase (one day for salt-free  
88 treatment, three days for 1.5 m NaClO<sub>4</sub> and 2.4 NaCl, six days for 2.4 m NaClO<sub>4</sub>, and seven days  
89 for 3.9 m NaCl, coinciding with a much slower growth at increasing salt stress levels).

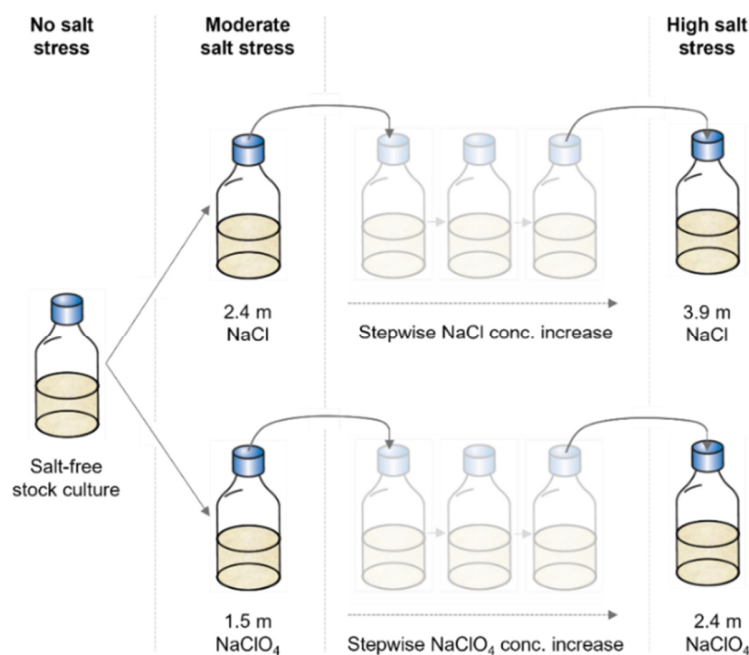

90

91 **Figure 1.** Workflow of the inoculation procedure and culture preconditioning. A salt-free stock culture of *D.*  
92 *hansenii* was frequently reinoculated into fresh growth medium. An aliquot of this culture was used to inoculate  
93 growth media exhibiting moderate cellular salt stress (2.4 m NaCl and 1.5 m NaClO<sub>4</sub>). To obtain cell growth  
94 at even higher salt concentrations, a stepwise concentration increase was needed for each inoculation step.  
95 The maximum salt concentrations used in this study were 3.9 m NaCl and 2.4 m NaClO<sub>4</sub>. Samples for protein  
96 extraction were taken in the late exponential growth phase of the respective treatments. Each treatment type  
97 was inoculated and treated in biological triplicates.

98

99 In total, 2713 proteins were detected representing a bulk coding sequence coverage of approx.  
100 43%. Through analysis of variance (ANOVA, FDR < 0.01) of the z-normalized protein abundances,  
101 the expression of 1099 proteins was found to be significantly different between the five different  
102 treatment types (one salt-free control, and four salt-containing treatments). The salt stress level  
103 (moderate vs. high salt stress) had a stronger impact on the intensity of protein expression than  
104 the type of anion or molal concentration (2.4 m NaCl vs. 2.4 m NaClO<sub>4</sub>) as can be seen from the  
105 comparison of protein abundances of all replicates, which show similar protein expressions for the  
106 same salt stress regimes (Fig. 2a). This is confirmed by the principal component analysis (PCA)  
107 which revealed a clear clustering of the replicates of each treatment in dependence on salt stress  
108 level and type of anions (Fig. 2b). While the physiological response to different salt stress levels  
109 clustered along principal component 1 and explains 55% of the observed differences, the salt  
110 species had a lower impact on the variability (15%), as treatments exposed to chloride or  
111 perchlorate spread along the principal component 2.

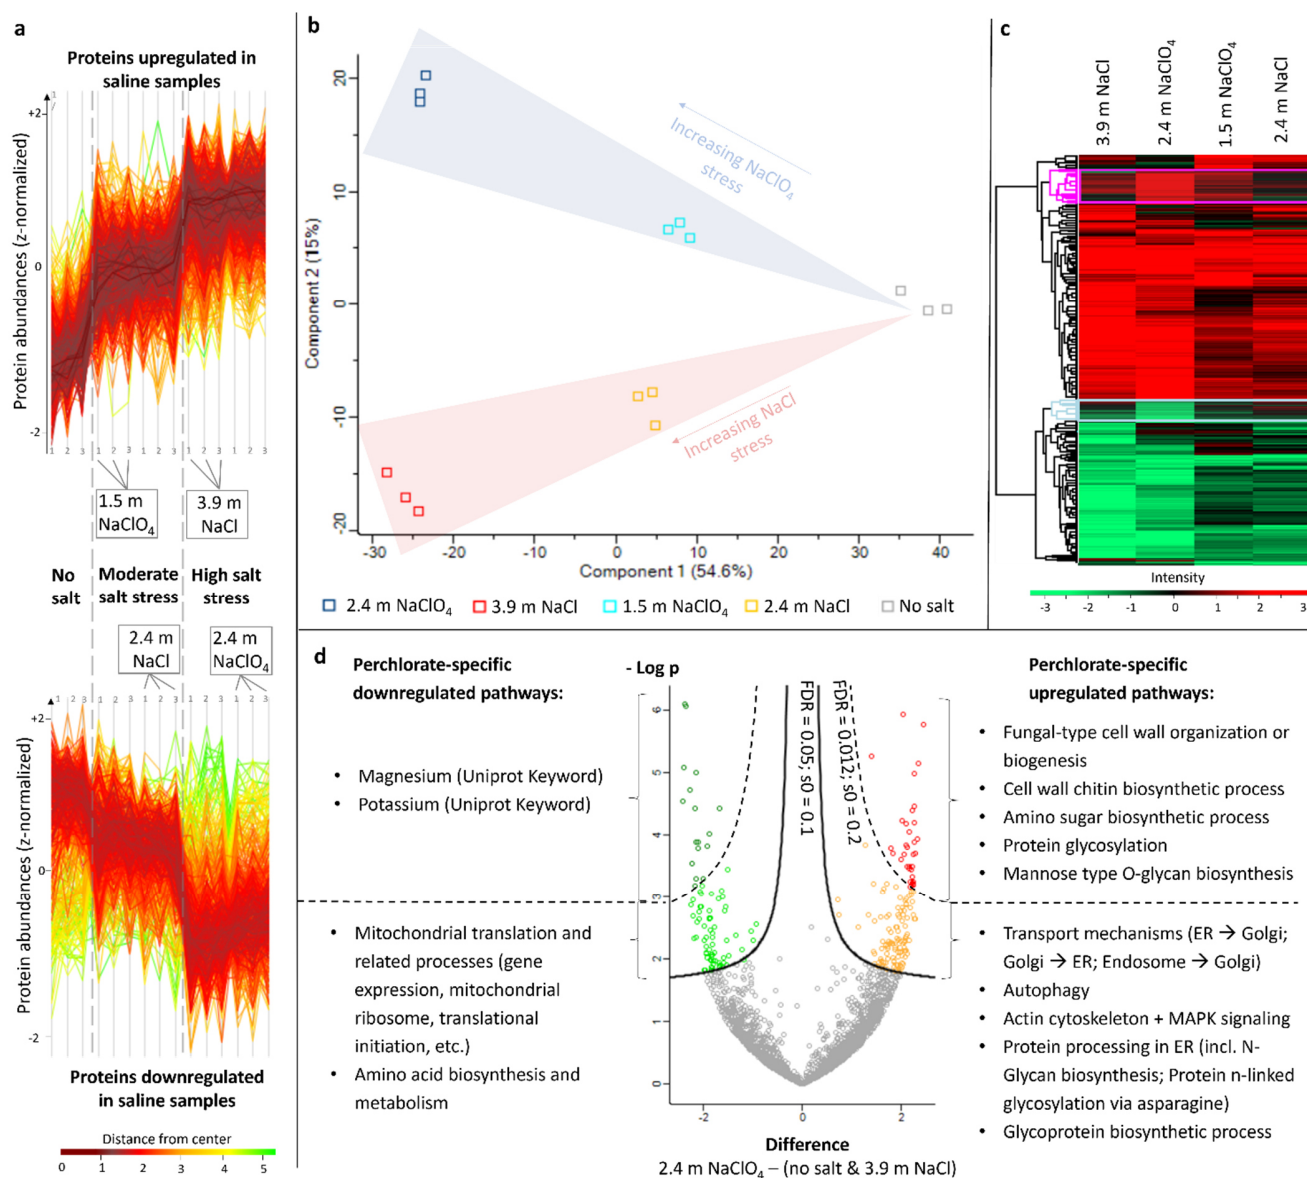

112

113 **Figure 2.** Results of the proteomic analyses. **(a)** Abundances of upregulated (upper plot) and downregulated  
 114 (lower plot) proteins expressed in all investigated samples (three replicates for each treatment). **(b)** Principal  
 115 component analysis (PCA) demonstrating clear clustering of all biological triplicates in dependence of salt  
 116 stress level and type of anion. **(c)** Heat map including all proteins passing ANOVA (FDR < 0.01) and post hoc  
 117 test (FDR < 0.05) generated by the Perseus software after hierarchical clustering. Upregulated proteins  
 118 (compared to the salt-free treatment) are colored red and downregulated proteins are shown in green. Two  
 119 exemplarily perchlorate-specific clusters are highlighted in pink for upregulated and in cyan for downregulated  
 120 proteins. **(d)** Volcano plot visualizing perchlorate-specific regulated proteins with a high (FDR ≤ 0.012) and a  
 121 lower significance (0.012 ≤ FDR ≤ 0.05). Significantly regulated metabolic pathways are analyzed with the  
 122 STRING database.

123

124 Post hoc testing (FDR < 0.05) revealed 1068 proteins to be significantly regulated in at least one  
125 of the salt-containing samples compared to the salt-free treatment. The log<sub>2</sub>-fold changes of  
126 proteins in the saline treatments compared to the salt-free control were plotted in a heatmap with  
127 upregulated proteins colored red and downregulated protein shown in green (Fig. 2c). The heatmap  
128 reveals two major clusters, one containing the proteins predominantly upregulated in all saline  
129 treatments compared to the salt-free control, and a second cluster with downregulated proteins.  
130 This indicates that the overall salt stress response is relatively similar in all treatments. However,  
131 both main clusters also contain proteins that are substantially more regulated in the 2.4 m NaClO<sub>4</sub>  
132 than in all other treatments. The two largest subclusters containing proteins of this category are  
133 highlighted in pink (for upregulated proteins) and cyan (for downregulated proteins) in Fig. 2c.  
134 Proteins in these subclusters represent the perchlorate-specific stress response, which apparently  
135 manifests only at high perchlorate concentrations, as protein expression patterns in the 1.5 m  
136 NaClO<sub>4</sub> treatment are coinciding more with the NaCl than with the 2.4 m NaClO<sub>4</sub> treatment.

137 This enables the possibility to investigate the significance of perchlorate-specific protein expression  
138 patterns by a volcano plot that presents the differences of the z-normalized protein abundances in  
139 the 2.4 m NaClO<sub>4</sub> treatment and the control samples (salt-free and 3.9 m NaCl) vs. the logarithmic  
140 p value after a t-test (Fig. 2d). The resulting perchlorate-specific regulated proteins include the ones  
141 from the heatmap subclusters (marked pink and cyan in Fig. 2c) and additional proteins from  
142 smaller subclusters. Proteins were fed into the STRING database (18) which predicts physical and  
143 functional protein-protein interactions and identifies significantly enriched (FDR < 0.05) metabolic  
144 pathways that assort into protein clusters (Fig. 3a, and Table S1). The physiological interpretation  
145 of the perchlorate-specific enriched pathways is summarized in Fig. 3b and discussed in detail in  
146 section 3.2.

147 In order to better evaluate the specificity of perchlorate-induced stress responses, they must be  
148 compared to the overall salt stress response which is shared by all saline treatments. For this  
149 purpose, proteins that show significant expression (FDR < 0.05) in all salt-containing treatments  
150 compared to the salt-free control have been analyzed with the STRING database. The results of  
151 this approach are discussed below and summarized in the Table S1 and Fig. S1.



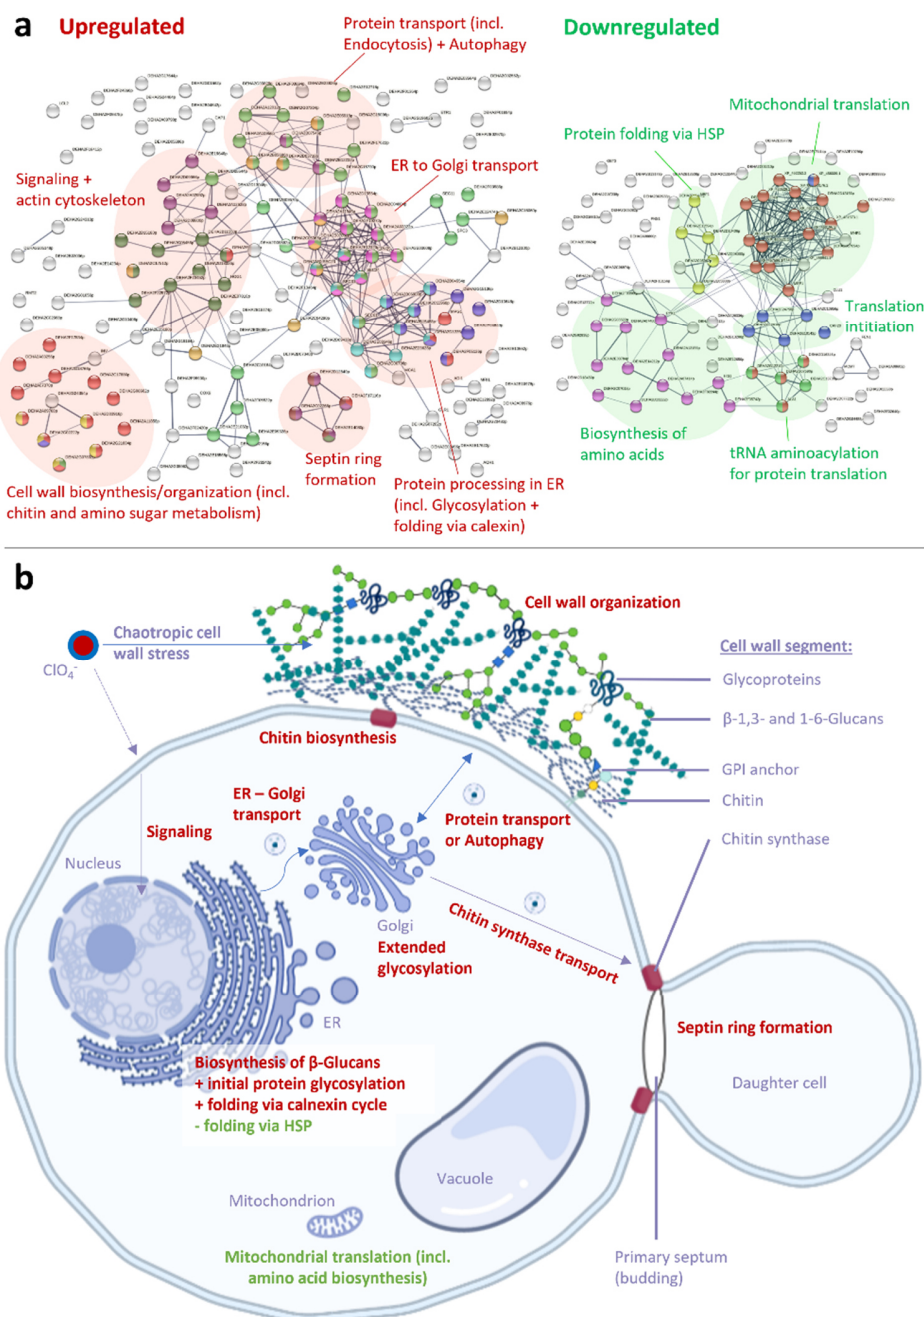

152

153 **Figure 3.** Perchlorate-specific stress responses. **(a)** STRING database calculated interactions of all  
 154 upregulated (left) and downregulated (right) proteins involved in the perchlorate-specific stress response  
 155 according to the volcano plot (Fig. 2d). The line thickness of the network edges indicates the strength of data  
 156 support. The minimum required interaction score was set to 0.6 for up- and 0.5 for downregulated proteins.  
 157 Colored proteins indicate significantly enriched metabolic pathways (FDR < 0.05) and are annotated in Table  
 158 S1. The most prominent pathways are encircled. **(b)** A mother cell and a budding daughter cell of  
 159 *Debaryomyces hansenii* displaying the most relevant metabolic pathways with perchlorate-specific  
 160 upregulations (red) and downregulations (green) as explained in the main text. Created with BioRender.com.

161 **Discussion**

162

163 *3.1 General salt stress response*

164 The general salt stress response observed in all saline treatments encompasses several metabolic  
165 stress response pathways, previously well described for *D. hansenii* and its close relative, the  
166 intensively investigated yeast *S. cerevisiae* (15, 19). Only the most prominent pathways detected  
167 in this study are described below. Any form of environmental stress in yeasts is usually  
168 communicated from the cell envelope to the nucleus via signaling pathways such as mitogen-  
169 activated protein kinase (MAPK) pathways (20) accompanied by a rearrangement of cytoskeletal  
170 arrays (21). Several proteins involved in these signaling pathways were found to be upregulated in  
171 all saline treatments (see Table S1 and Fig. S1). For example, the upregulated serine/threonine-  
172 protein kinase CLA4 (DEHA2B12430p) modulates the expression of biosynthesis of glycerol (22),  
173 an important osmoprotectant in *D. hansenii* (15).

174 As a consequence of the received signal, the cell's energy metabolism is upregulated to induce  
175 certain stress responses. In our experiments, several energy-releasing pathways were upregulated  
176 in the general osmotic stress response, such as the TCA cycle. Furthermore, processes in the  
177 peroxisomes showed upregulation including the energy-releasing beta-oxidation of fatty acids  
178 indicated by upregulation of the multifunctional beta-oxidation protein DEHA2A08646p, the acyl-  
179 coenzyme A oxidase POX1 (DEHA2D17248p), and the peroxisomal long-chain fatty acid import  
180 protein DEHA2B08646p. In yeasts, also the glyoxylate cycle, a variation of the TCA cycle (23),  
181 takes place in the peroxisomes as well as in the cytoplasm, and correspondingly the two key-  
182 enzymes, i.e., malate synthase (DEHA2E13530p) and isocitrate lyase (ICL1 DEHA2D12936p), are  
183 upregulated.

184 The energy released from these processes is presumably needed to guarantee survival under  
185 enhanced osmotic cell stress. For example, the amount of biosynthesized glycerol is increased as  
186 can be observed by the upregulation of the glycerol lipid metabolism which includes proteins that  
187 participate in the formation of glycerol, e.g. several significantly enriched glycerol-3-phosphate  
188 dehydrogenase complex proteins. In addition to the accumulation of glycerol, osmotic stress in *D.*  
189 *hansenii* can also be antagonized through ion transmembrane transporters (24). Even though not  
190 being incorporated in a significant enrichment, we found several ion transporter proteins to be  
191 upregulated, such as the ATPase-coupled cation transmembrane transporters DEHA2G09108p  
192 and DEHA2C02552p (Table S1). These two cation transporters showed the highest significance  
193 upon all proteins upregulated in the saline treatments (see volcano plot in Fig. S1). The provision



194 of sufficient ATP required for the functioning of these transporters constitutes to the enhanced  
195 cellular energy demand.

196 Osmotic stress usually induces oxidative stress to a some extent, e.g. by production of reactive  
197 oxygen species (ROS) in the mitochondria (25). Hence, it is expected that proteins involved in  
198 oxidative stress responses are regulated under salt stress conditions as well. Indeed, we found  
199 antioxidant activity and glutathione metabolic processes to be upregulated, including the enzymes  
200 catalase (DEHA2F10582g) and peroxidase (DEHA2A02310p) enabling cell protection against  
201 oxidative stress.

202 The significantly enriched pathway forming the most pronounced and condensed upregulated  
203 protein cluster contains proteins involved in the modification-dependent protein catabolic process  
204 and ubiquitin mediated proteolysis (Fig. S1). Osmotic and induced oxidative stresses can cause  
205 protein misfolding (26). Proteins which cannot be refolded by chaperones are degraded by the  
206 proteasome of the cell (27). The so generated amino acids can then be reused for cellular amino  
207 acid metabolism, which forms a protein subcluster interwoven with the TCA cycle, indicating that  
208 the amino acids liberated by proteolysis feed the energy metabolism. Additionally, the recycling of  
209 amino acids via proteolysis conserves energy as compared to amino acid *de novo* biosynthesis.

210 Most of the stress responses described above require protein transport, e.g., for posttranslational  
211 modifications in the ER or the Golgi apparatus, for the transfer of proteins to their place of activity,  
212 or for the excretion of cell wall proteins. Consistently, many of the upregulated proteins in the  
213 general salt response are involved in protein transport mechanisms.

214 More than half of the proteins downregulated due to general salt stress are structural ribosomal  
215 constituents and have translation factor activity or are involved in the cytosolic (pre)ribosome  
216 biogenesis and related pathways such as the nucleotide metabolism (Fig. S1). Ribosome  
217 biogenesis is a complex and very energy-demanding process (28). Consequently, for saving  
218 energy, ribosome biogenesis is downregulated under various stress conditions (29). A transient  
219 reduction in ribosome biogenesis and translation together with the accumulation of glycerol has  
220 also been detected in *Candida albicans* upon salt stress (30). While ribosome biogenesis was  
221 generally downregulated in our experiments, we consistently observed upregulation of the  
222 ribosome-recycling factor RRF1 (DEHA2F14630g) which allows the ribosome to unbind from  
223 mRNA after the release of the generated polypeptide and to be reused for new translation  
224 processes instead of the energy-consuming *de novo* biosynthesis of ribosomes (31).

225 Upregulation of ribosome synthesis occurs only in response to favorable growth conditions and  
226 enables the cell to grow faster (32), while downregulation of translation via depletion of the

227 ribosomal population is known to prolong the lifespan of cells (33). Consistently, we found that the  
228 downregulation of ribosome biosynthesis and concomitant translational processes coincided with  
229 slower cell growth under salt stress conditions.

230 The only other significantly enriched downregulated pathway forming a protein cluster that is  
231 physiologically not directly connected to the ribosome assembly and translational processes is the  
232 biosynthesis of ergosterol (Fig. S1), a component of fungal cell membranes (34). In *S. cerevisiae*,  
233 the downregulation of the ergosterol biosynthesis has already been described earlier as response  
234 to hyperosmotic stress (35). It has been hypothesized that it results from increased uptake of Na<sup>+</sup>  
235 and/or a decreased Na<sup>+</sup> extrusion in a plasma membrane environment with elevated levels of  
236 ergosterol (35). Furthermore, sterol biosynthesis is a highly energy-consuming process (36), and  
237 its downregulation might constitute, similar to the downregulation of the ribosome biogenesis, an  
238 energy-saving approach.

239

### 240 3.2 Perchlorate-specific stress response

241 In a previous study we demonstrated that *D. hansenii* has the highest microbial perchlorate  
242 tolerance reported to date (14). However, subsequent experiments revealed that the tolerance  
243 towards NaClO<sub>4</sub> (2.5 mol/kg) was still more than one third lower than towards NaCl (4.0 mol/kg),  
244 even though the water activity was substantially higher in the NaClO<sub>4</sub>-containing growth medium  
245 (0.926) than in the NaCl-rich medium (0.854) (13). Differences in salt tolerances were interpreted  
246 by the authors to account for the chaotropic stress exerted by the perchlorate anion. This  
247 interpretation is strongly supported by our proteomic investigations as explained below.

248 As a chaotropic ion, perchlorate is destabilizing biomacromolecules such as proteins (37) or glycan  
249 (i.e. polysaccharide) macromolecules (38). The fungal cell wall of *D. hansenii*'s close relative, *S.*  
250 *cerevisiae*, consists of approx. 85% glycans (incl. 1-2% chitin) and 15% cell wall proteins (39).  
251 Hence, it can be expected that the presence of chaotropic perchlorate induces cell wall stress in  
252 addition to the general salt stress. Our results suggest that yeast cells counteract this chaotropic  
253 stress to a certain extent by increasing the bioproduction rate of cell wall components.

254 For example, chitin metabolic processes (incl. the synthesis of its amino sugar precursors) were  
255 found to be significantly upregulated under perchlorate stress conditions (Fig. 3) and show a higher  
256 significance for the perchlorate-specific stress response than other metabolic pathways (Fig. 2d).  
257 Although being a minor component of fungal cells wall, chitin provides important structural stability  
258 (40). Chitin is produced by chitin synthases, such as the upregulated DEHA2D03916p, to a lesser  
259 degree directly in the lateral cell wall and to a higher extent in the primary septum during cell

260 budding (39), presumably to protect the emerging nascent cell (40). This highlights the importance  
261 of enriched chitin synthesis already during budding under perchlorate stress which otherwise might  
262 chaotropically destabilize the nascent cell envelope. This also explains the upregulation of septin  
263 proteins (Fig. 3) which provide structural support during cell division at the septum (41).

264 Another metabolic pathway upregulated under perchlorate-specific stress conditions is the  
265 glycosylation of proteins. Studies have shown that N-glycosylation is stabilizing proteins (42) also  
266 with respect to chaotropic denaturation (43). The glycosylation-induced increase in protein stability  
267 affects both intracellular proteins as well as cell wall proteins. However, in contrast to intracellular  
268 proteins which are usually N-glycosylated in the ER with only 9 to 13 glycan residues, cell wall  
269 proteins experience an extensive additional glycosylation (including O-glycosylation) in the Golgi  
270 apparatus resulting in a highly branched structure containing as many as 200 glycan residues (39).  
271 We found that one of the most pronounced and densest perchlorate-specific upregulated protein  
272 clusters contained proteins involved in the ER to Golgi vesicle mediated transport (Fig. 3a). This  
273 suggests that a large part of the upregulated glycosylation processes is applied to cell wall proteins.  
274 Furthermore, three of the upregulated proteins involved in protein glycosylation are O-  
275 mannosyltransferases involved in O-glycosylation, which is essential for cell wall rigidity (44) and  
276 also upregulated upon heat stress (45).

277 The glycosylated cell wall proteins are transported from the Golgi apparatus via vesicle mediated  
278 transport to the cell wall. A protein that needs to be highlighted in this context is the upregulated  
279 Chs5-Arf1p-binding protein DEHA2G07832p whose homologue in *S. cerevisiae* mediates export  
280 of chitin synthase 3 from the Golgi apparatus and the transport to the plasma membrane in the bud  
281 neck region (46) confirming the importance of cell wall chitin metabolic processes under perchlorate  
282 stress. Misfolded proteins or proteins chaotropically denatured despite stabilizing glycosylation  
283 might be autophagically degraded explaining the upregulation of proteins involved in autophagy  
284 (Fig. 3).

285 Among the perchlorate-specific upregulated proteins are several proteins that are involved in cell  
286 wall biogenesis and remodeling. Apart from the chitin synthases, these are, e.g., the two  
287 glycosidases DEHA2G21604p (glycoside hydrolase family 16, CRH1 homolog in *S. cerevisiae*) and  
288 DEHA2G18766p (Glucan 1,3-beta-glucosidase BGL2) responsible for glucan cross-linking and  
289 chain elongation in the cell wall (47, 48). Stronger cross-linking of cell wall components and  
290 concomitant disability to separate cells after cell division might explain the formation of cell chains  
291 of *Hydrogenothermus marinus* (49) and of large cell aggregates of *Planococcus halocryophilus* (50)  
292 when exposed to perchlorate stress.

293 In comparison to the upregulated cell wall biosynthesis and organization as well as the protein  
294 glycosylation, all downregulated perchlorate-specific processes have a lower significance (Fig. 2d).  
295 The most pronounced downregulated protein subcluster contains proteins involved in mitochondrial  
296 translation and is physiologically linked to the simultaneously downregulated amino acid  
297 biosynthesis, the tRNA aminoacylation for protein translation, and the translation initiation (Fig. 3a).  
298 Apart from energy-saving aspects similar to the downregulation of cytosolic translation under  
299 general salt stress conditions (section 3.1), it has been described that changes in mitochondrial  
300 translation accuracy modulate cytoplasmic protein quality control (51). For example, it has been  
301 observed that decreasing mitochondrial translation output coincides with cytoplasmic protein  
302 folding (52) which seems plausible under chaotropic stress conditions that promote destabilization  
303 of protein tertiary and quaternary structures.

304 Therefore, it might be surprising at first, that the machinery for protein folding via heat shock  
305 proteins (often acting as chaperons) is downregulated under perchlorate stress conditions (Fig. 3).  
306 However, protein folding is regulated by two major folding pathways. The general pathway is mostly  
307 mediated by 70-kDa heat shock proteins (Hsp70), while the second pathway, called the calnexin  
308 cycle, is dedicated for N-glycosylated proteins and requires, among others, the action of the  
309 proteins calnexin (or its homologue calreticulin) and disulfide isomerase (53). Since we observed  
310 a high degree of protein glycosylation in the perchlorate-specific stress response, it seems likely  
311 that not the heat shock protein mediated folding pathway is upregulated under perchlorate stress,  
312 but rather the calnexin cycle. Indeed, we detected perchlorate-specific upregulations of the disulfide  
313 isomerase DEHA2E23628p, and the calnexin homologue DEHA2E03146p as part of the of the  
314 protein processing in the ER cluster (Fig. 3a, Table S1).

315 The reduced mitochondrial translation might also be explained by the prevention of proteotoxic  
316 stress within the mitochondria as mitochondrial encoded proteins cannot be stabilized by  
317 glycosylation which takes place exclusively in the ER and Golgi apparatus (intramitochondrial  
318 glycosylation is under debate (54), however, this process has not yet been described for yeast  
319 cells), and therefore might be denatured more easily under perchlorate stress. Following this  
320 argumentation, the mitochondrial translation might be downregulated to the minimal required  
321 performance to avoid accumulation of denatured proteins within the mitochondria.

322

### 323 *3.3 The role of perchlorate-induced oxidative stress*

324 Due to the high oxidation state (+7) of the chlorine atom in the center of the perchlorate anion, it is  
325 expected that perchlorate exhibits a stronger oxidation stress response than observed in the  
326 general salt stress response. Indeed, there is evidence that several genes in microorganisms from

327 sediments of hypersaline ponds increase both the resistance to perchlorate and to oxidative stress  
328 induced by hydrogen peroxide (55). Furthermore, increased levels of lipid peroxidation after growth  
329 of different species of cyanobacteria in perchlorate-containing growth media were interpreted as  
330 results of oxidative stress (56). However, the authors did not investigate whether the oxidative  
331 stress is perchlorate-specific or the result of general salt or osmotic stresses.

332 From all proteins potentially involved in oxidative stress response (e.g., superoxide dismutase,  
333 catalase, glutathione reductase, glutathione peroxidase, glutaredoxin, glyoxalase, or thioredoxin),  
334 in our experiments only the glutathione reductase GLR1 was observed to be perchlorate-  
335 specifically upregulated with a low significance (FDR > 0.012, Table S1). GLR1 is involved in a  
336 multiplicity of cellular functions including besides the protection of cells from oxidative damage also  
337 amino acid transport as well as DNA and protein synthesis (57). This indicates that the oxidative  
338 stress response is not substantially upregulated under perchlorate stress compared to general salt  
339 stress.

340 Reducing the mitochondrial translation activity (Section 3.2) might also be interpreted as an attempt  
341 of the cell to minimize ROS production during aerobic respiration. Indeed, previous studies  
342 indicated that perchlorate induces oxidative stress to mitochondria by enhanced ROS production  
343 (58, 59). Yet, similar to the enhanced lipid peroxidation of cells grown in perchlorate-containing  
344 medium (56), the missing comparisons with NaCl or other solutes made it impossible for the authors  
345 of these studies to proof that the increased ROS levels resulted from perchlorate-specific reactions  
346 and are not caused by the general osmotic stress. If the reduced mitochondrial translation activity  
347 observed in our experiments would be a result of an enhanced oxidative stress, a concomitant  
348 downregulation of respiratory chain proteins would be expected to occur. However, we did not  
349 observe a conclusive downregulation of these kind of proteins. For example, while the cytochrome  
350 c oxidase (COX) assembly mitochondrial protein DEHA2C13244p was downregulated, the COX  
351 subunit 9 was upregulated under perchlorate-specific stress conditions.

352 In summary, the proteomic data suggests that antioxidant activity is important for survival under  
353 general salt stress conditions (Section 3.1), but the oxidative stress induced specifically by  
354 perchlorate seems to play only a minor role compared to the chaotropic stress. This is in  
355 accordance with previous experiments demonstrating that the more oxidatively reactive (but less  
356 chaotropic) chlorate anion ( $\text{ClO}_3^-$ ) can be better tolerated by *D. hansenii* than perchlorate, which  
357 indicates the oxidative character alone cannot account significantly to the additional stress  
358 exhibited by  $\text{NaClO}_4$  compared to NaCl (13). A possible explanation for this phenomenon is that  
359 perchlorate is astonishingly stable in solution under ambient temperatures (60) due to the reduction  
360 rate-limiting oxygen atom transfer (61). These additional stressors (chaotropicity, and potentially to

361 a minor degree also oxidative stress) presumably require different or more distinct stress signaling  
362 which likely explains the upregulation of proteins involved in signaling and the actin cytoskeleton  
363 organization pathways (Fig. 3) in addition to the proteins expressed as general salt stress  
364 responses.

365 The most relevant of the above-described perchlorate-induced chaotropic stress responses are  
366 graphically summarized in Fig. 3b. In particular, cell wall genesis is a very energy-consuming  
367 process (62), but also intensive protein glycosylation required for protein stability under perchlorate  
368 stress costs additional energy compared to non-chaotropic conditions. While in the non-chaotropic  
369 NaCl-stressed samples most of the energy provided by stress-adapted cell metabolism can be  
370 used to counteract osmotic and induced oxidative stresses, in perchlorate-containing samples a  
371 substantial part of the cellular energy demand is required for counteracting chaotropic stress  
372 resulting in a lower NaClO<sub>4</sub> tolerance of *D. hansenii* compared to NaCl.

373

#### 374 *3.4 Consequences for microbial habitability of perchlorate-rich environments on Mars*

375 This study provides new insights for putative life on Mars if it exists in perchlorate-rich regions,  
376 which have been identified during the exploration of Mars (5, 63, 64). Protein glycosylation and cell  
377 wall organization are major stress responses emerging only after long-term adaptations to high  
378 perchlorate concentrations, while being not significantly expressed after perchlorate-shock at  
379 moderate salt concentrations. Hence, it is likely that biomacromolecules and cell envelopes of  
380 putative Martian microorganisms exposed to perchlorate-rich brines would evolve stable  
381 conformations and prefer covalent bonds and cross-linking over looser electrostatic interactions,  
382 hydrogen bonding or hydrophobic effects. Additionally, cell components susceptible to chaotropic  
383 stress might be stabilized by the attachment of polymers similar to stabilization effects via protein  
384 glycosylation as observed in our experiments.

385 Furthermore, previous microscopic observations (49, 50) indicate that larger cell aggregates are  
386 more likely to occur (possibly due to cell wall rearrangements and cross-linking) under perchlorate  
387 stress than single cells. Consequently, cell clusters or biofilms might be considered as potential  
388 macroscopic visible biosignatures on Mars, however, metabolomic changes under perchlorate  
389 stress should be investigated in upcoming experiments as well in order to identify potential  
390 perchlorate-specific biomarkers on the molecular level.

391 The presented results are also important for *in-situ* resource utilization (ISRU) technologies to  
392 support a human outpost on Mars (65). Oxygen and food production by phototrophic  
393 microorganisms and the recycling of waste material in perchlorate-rich Martian soil might be



394 conducted by “chaotolerant” (66) organisms, because they would likely possess a metabolic toolset  
395 for stabilization of biomacromolecules similar to *D. hansenii*. Alternatively, genes responsible for  
396 increased biomacromolecular stability might be used in synthetic biology to create perchlorate  
397 resistance strains that can thrive in perchlorate-rich Martian soil without the necessity for  
398 perchlorate remediation (55).

399 The presence of perchlorates might be even beneficial for enzymatic activities at the low  
400 temperatures prevailing on Mars due to a reduced enthalpy of activation owing to chaotropic effects  
401 of perchlorate salts (67). Our data indicates that perchlorate-induced oxidative stress is not  
402 substantially higher than for other salts like NaCl. However, this might be only true for the Martian  
403 subsurface, because close to the surface, cosmic radiation could decompose perchlorates to far  
404 more reactive oxychlorine species such as hypochlorite which exhibit a strong oxidative stress (68)  
405 and be extremely detrimental to any life.

406

## 407 **Conclusions**

408

409 The results of this study revealed perchlorate-specific microbial stress responses never described  
410 in this context before. Even though NaCl- and NaClO<sub>4</sub>-induced stress responses in *D. hansenii*  
411 share several metabolic features, we identified enhanced protein glycosylation, folding via calnexin  
412 cycle and cell wall biosynthesis as a counteractive measure to perchlorate-induced chaotropic  
413 stress which generally destabilizes biomacromolecules. At the same time, mitochondrial translation  
414 processes are downregulated under perchlorate-specific stress. When applying these physiological  
415 adaptations, cells can increase their perchlorate tolerance substantially compared to perchlorate  
416 shock exposure. These findings make it likely that putative microorganisms on Mars can draw on  
417 similar adaptation mechanisms enabling survival in perchlorate brines on Mars.

418

## 419 **Materials and Methods**

420

### 421 *5.1 Microbial cultures*

422 The halotolerant yeast *D. hansenii* (DSM 3428) was obtained from the Leibniz Institute DSMZ -  
423 German Collection of Microorganisms and Cell Cultures. A stock culture was grown aerobically  
424 without shaking at 25°C (optimum growth temperature) in liquid DMSZ growth medium #90 (3%  
425 malt extract, 0.3% soya peptone) and was frequently reinoculated. Additionally, four different salt-  
426 containing liquid growth media (DSMZ #90) were prepared having a molal (m, mol/kg) salt  
427 concentration of either 1.5 m NaClO<sub>4</sub>, 2.4 m NaCl, 2.4 m NaClO<sub>4</sub>, or 3.9 m NaCl. The latter two

428 concentrations represent the almost highest concentrations of the respective salt enabling growth  
429 of *D. hansenii*. The maximum growth-enabling concentrations reported to date are 2.5 m NaClO<sub>4</sub>  
430 and 4.0 m NaCl (13). We choose slightly lower concentrations to guarantee reproducible growth of  
431 the cultures and to generate sufficient biomass for protein extraction. The other two salt  
432 concentrations (1.5 m NaClO<sub>4</sub> and 2.4 m NaCl) represent moderate stress conditions of the  
433 respective salt (~62% of the maximum salt concentration suitable for growth). The availability of two  
434 treatments with the same molal salt concentrations (2.4 m NaCl and 2.4 m NaClO<sub>4</sub>) allowed for an  
435 additional comparison of cellular stress responses to the two different salt species at the same  
436 osmolality. The growth media were prepared by mixing the media components, the salt and water,  
437 followed by pH adjustment (pH ~ 5.6) and sterile filtration. All treatments (no salt, 1.5 m NaClO<sub>4</sub>,  
438 2.4 m NaCl, 2.4 m NaClO<sub>4</sub>, and 3.9 m NaCl) were inoculated as biological triplicates, i.e. for each  
439 treatment three different samples were inoculated. The salt-free treatment as well as the samples  
440 containing 1.5 m NaClO<sub>4</sub> and 2.4 m NaCl were inoculated with the salt-free stock culture. Hence,  
441 the two saline treatments experienced a salt shock after inoculation. Since the respective salt shock  
442 would be too intense in 2.4 m NaClO<sub>4</sub> and 3.9 m NaCl treatments to enable growth, these samples  
443 were inoculated with long-term adapted cultures already grown at the respective salt concentration  
444 (Figure 1).

#### 445 *5.2 Sample preparation for proteomics*

446 Protein extraction was conducted using the recently developed filter-aided Sample Preparation by  
447 Easy Extraction and Digestion (fa-SPEED) protocol (17). Cells were centrifuged for 3 minutes at  
448 5.000 x g after reaching exponential growth phase which is 1 day for salt-free treatments, 3 days  
449 for 1.5 m NaClO<sub>4</sub> and 2.4 NaCl, 6 days for 2.4 m NaClO<sub>4</sub>, and 7 days for 3.9 m NaCl. Cell pelleting  
450 in 3.9 m NaCl samples was incomplete (turbid supernatant), but sufficient for further protein  
451 extraction. The reason for incomplete pelleting is presumably an electrostatic repulsion of cells  
452 because dilution of additional test samples did not result in larger pellets, but gently stirring with a  
453 grounded metal rod before centrifugation did. The cell pellets were washed three times with  
454 phosphate buffer saline (PBS) followed by cell lysing with 50 µL trifluoroacetic acid (TFA) for 3  
455 minutes at 70°C. Afterwards, samples were neutralized with 500 µL 2 M  
456 tris(hydroxymethyl)aminomethane (TRIS) solution. After adding 55 µL reduction/alkylation buffer  
457 (100mM tris(2-carboxyethyl)phosphine / 400 mM 2-Chloracetamid), the samples were incubated at  
458 95°C for 5 minutes.

459 Protein concentrations were determined by turbidity measurements at 360 nm using GENESYS™  
460 10S UV-Vis spectrophotometer (Thermo Fisher Scientific). Fifty µg proteins were diluted to 40 µL  
461 using a 10:1 (v/v) mixture of 2 M TrisBase and TFA, mixed with 160 µL acetone and incubated for

462 2 min at RT. For samples containing less than 50 µg proteins per 40 µL sample, the volumes of  
463 sample and acetone were increased at constant sample/acetone ratio until 50 µg protein/sample  
464 were reached. Afterwards, proteins were captured on Ultrafree®-MC (0.5 mL) centrifugal devices,  
465 0.2 µm, PTFE (Merck) at 5000 x g for 2 min. The samples were washed successively with 200 µL  
466 80% acetone, 200 µL 100% acetone and 200 µL n-pentane at 5000 x g for 2 min each.

467 Subsequently, 40 µL digestion buffer (50 mM ammonium bicarbonate) containing trypsin (1:25  
468 (enzyme to protein ratio) Trypsin Gold, Mass Spectrometry Grade (Promega)) was added to the  
469 filter containing the proteins followed by incubation at 37 °C for 20 hours. The sample solution  
470 containing the digested proteins was centrifuged at 5.000 x g for 2 min and the filter was washed  
471 subsequently with 40 µL digestion buffer containing 0.1% TFA. 10% TFA solution was added until  
472 the pH of the samples reached approx. 2. Peptides were desalted using the Pierce™ Peptide  
473 Desalting Spin Columns (Thermo Scientific) according to the manufacture's protocol no. 2162704.  
474 The desalted samples were dried in a vacuum concentrator. The dried peptides were dissolved in  
475 0.1% formic acid and quantified by measuring the absorbance at 280 nm using an Implen NP80  
476 spectrophotometer (Implen, Munich, Germany).

### 477 *5.3 Liquid Chromatography and Mass Spectrometry*

478 Peptides were analysed on an EASY-nanoLC 1200 (Thermo Fisher Scientific, Bremen, Germany)  
479 coupled online to a Q Exactive™ HF mass spectrometer (Thermo Fisher Scientific). One µg of  
480 peptides was separated on a PepSep column (15 cm length, 75 µm i.d., 1.9 µm C18 beads,  
481 PepSep, Denmark) using a stepped 30 min gradient of 80 % acetonitrile (solvent B) in 0.1 % formic  
482 acid (solvent A) at 300 nL/min flow rate: 5–11 % B in 2:49 min, 11–29 % B in 18:04 min, 29–33 %  
483 B in 3:03 min, 33–39 % B in 2:04 min, 39–95 % B in 0:10 min, 95 % B for 2:50 min, 95–0 % B in  
484 0:10 min and 0 % B for 0:50 min. Column temperature was kept at 50°C using a butterfly heater  
485 (Phoenix S&T, Chester, PA, USA). The Q Exactive™ HF was operated in a data-independent (DIA)  
486 manner in the m/z range of 345–1,650. Full scan spectra were recorded with a resolution of 120,000  
487 using an automatic gain control (AGC) target value of  $3 \times 10^6$  with a maximum injection time of 100  
488 ms. The full scans were followed by 62 DIA scans of dynamic window widths using an overlap of  
489 0.5 Th (16). DIA spectra were recorded at a resolution of 30,000 using an AGC target value of  $3 \times$   
490  $10^6$  with a maximum injection time of 55 ms and a first fixed mass of 200 Th. Normalized collision  
491 energy (NCE) was set to 27 % and default charge state was set to 3. Peptides were ionized using  
492 electrospray with a stainless-steel emitter, I.D. 30 µm (PepSep, Denmark) at a spray voltage of 2.1  
493 kV and a heated capillary temperature of 275°C.

494

#### 495 5.4 Data Analysis and Statistical Information

496 Protein sequences of *Debaryomyces hansenii* (UP000000599, downloaded 16/10/20), were  
497 obtained from UniProt (69). A spectral library was predicted for all possible peptides with strict  
498 trypsin specificity (KR not P) in the m/z range of 350–1,150 with charge states of 2–4 and allowing  
499 up to one missed cleavage site using ProSight (70). Input files for library prediction were generated  
500 using EncyclopeDIA (Version 0.9.5) (71). The data was analyzed using the predicted library with  
501 fixed mass tolerances of 10 ppm for MS<sup>1</sup> and 20 ppm for MS<sup>2</sup> spectra using the “robust LC (high  
502 accuracy)” quantification strategy. The false discovery rate was set to 0.01 for precursor  
503 identifications and proteins were grouped according to their respective genes. The resulting  
504 pg\_matrix.tsv file was used for further analysis in Perseus (version 1.6.5.0) (72).

505 The same program was used to z-normalize protein abundances followed by ANOVA (FDR =  
506 0.01) and Post Hoc testing (FDR =0.05). Subsequently, the abundances of biological triplicates  
507 were median averaged, and the relative log<sub>2</sub>-fold changes of the salt-containing (saline)  
508 treatments compared to the salt-free control were calculated. The results were filtered for  
509 significant pairs of the salt-free samples and at least one of the saline treatments and were then  
510 plotted into a hierarchical clustered. Additionally, volcano plots have be generated with the same  
511 software after t-test of the z-normalized protein abundances. Protein groups of interest were  
512 annotated and analyzed with the STRING database (<https://string-db.org/>)(18) regarding enriched  
513 metabolic pathways and the formation of functional protein clusters.

514

#### 515 **Acknowledgments and funding sources**

516

517 This Research was funded by the Deutsche Forschungsgemeinschaft (DFG, German Research  
518 Foundation) – 455070607.

519

#### 520 **Data availability**

521

522 The mass spectrometry proteomics data have been deposited to the ProteomeXchange  
523 Consortium (<http://proteomecentral.proteomexchange.org>) via the PRIDE (73) partner repository  
524 with the dataset identifier PXD033237.

525

#### 526 **Supplementary Information**

527

528 The metabolic enrichments retrieved from the STRING database are summarized in Table S1.

529 The general proteomic salt stress response of *D. hansenii* is shown in Fig. S1.

530 **Author Contributions**

531 J.H. performed growth experiments with *D. hansenii*. J.H. and A.S. conducted protein extraction.  
532 J.H., J.D., D.M., and P.L. accomplished proteomic analysis. All authors, including J.H., J.D., D.M.,  
533 A.S., P.L., H.-P.G., and D.S.-M., contributed to the interpretation of results. J.H. wrote the  
534 manuscript with input from all authors.

535 **Competing Interest Statement**

536 The authors declare no competing interests.

537

538 **References**

- 539 1. B. C. Clark, V. M. Kolb, A. Steele, C. H. House, N. L. Lanza, P. J. Gasda, S. J. VanBommel,  
540 H. E. Newsom, J. Martínez-Frías, Origin of Life on Mars: Suitability and Opportunities. *Life*  
541 *(Basel, Switzerland)* **11** (2021).
- 542 2. G. M. Martínez, N. O. Renno, Water and Brines on Mars: Current Evidence and Implications  
543 for MSL. *Space Sci. Rev. (Space Science Reviews)* **175**, 29–51 (2013).
- 544 3. D. Maus, J. Heinz, J. Schirmack, A. Airo, S. P. Kounaves, D. Wagner, D. Schulze-Makuch,  
545 Methanogenic Archaea Can Produce Methane in Deliquescence-Driven Mars Analog  
546 Environments. *Scientific reports* **10**, 1758 (2020).
- 547 4. A. F. Davila, L. G. Duport, R. Melchiorri, J. Jänchen, S. Valea, de los Rios, Asunción, A. G.  
548 Fairén, D. Möhlmann, C. P. McKay, C. Ascaso, J. Wierchos, Hygroscopic salts and the  
549 potential for life on Mars. *Astrobiology* **10**, 617–628 (2010).
- 550 5. B. C. Clark, S. P. Kounaves, Evidence for the distribution of perchlorates on Mars.  
551 *International Journal of Astrobiology* **15**, 311–318 (2016).
- 552 6. S. P. Kounaves, S. T. Stroble, R. M. Anderson, Q. Moore, D. C. Catling, S. Douglas, C. P.  
553 McKay, D. W. Ming, P. H. Smith, L. K. Tamppari, A. P. Zent, Discovery of natural perchlorate  
554 in the Antarctic Dry Valleys and its global implications. *Environmental science & technology*  
555 **44**, 2360–2364 (2010).
- 556 7. D. C. Catling, M. W. Claire, K. J. Zahnle, R. C. Quinn, B. C. Clark, M. H. Hecht, S. Kounaves,  
557 Atmospheric origins of perchlorate on Mars and in the Atacama. *J. Geophys. Res.* **115**,  
558 E00E11 (2010).
- 559 8. J. D. Rummel, D. W. Beaty, M. A. Jones, C. Bakermans, N. G. Barlow, P. J. Boston, V. F.  
560 Chevrier, B. C. Clark, J.-P. P. de Vera, R. V. Gough, J. E. Hallsworth, J. W. Head, V. J. Hipkin,

- 561 T. L. Kieft, A. S. McEwen, M. T. Mellon, J. A. Mikucki, W. L. Nicholson, C. R. Omelon, R.  
562 Peterson, E. E. Roden, B. Sherwood Lollar, K. L. Tanaka, D. Viola, J. J. Wray, A new analysis  
563 of Mars "Special Regions": findings of the second MEPAG Special Regions Science Analysis  
564 Group (SR-SAG2). *Astrobiology* **14**, 887–968 (2014).
- 565 9. A. C. Waajen, J. Heinz, A. Airo, D. Schulze-Makuch, Physicochemical Salt Solution  
566 Parameters Limit the Survival of *Planococcus halocryophilus* in Martian Cryobrines. *Front.*  
567 *Microbiol.* **11**, 1284 (2020).
- 568 10.J. E. Hallsworth, M. M. Yakimov, P. N. Golyshin, Gillion, Jenny L M, G. D'Auria, de Lima  
569 Alves, Flavia, V. La Cono, M. Genovese, B. A. McKew, S. L. Hayes, G. Harris, L. Giuliano, K.  
570 N. Timmis, T. J. McGenity, Limits of life in MgCl<sub>2</sub>-containing environments: chaotropicity  
571 defines the window. *Environmental microbiology* **9**, 801–813 (2007).
- 572 11.A. M. Hyde, S. L. Zultanski, J. H. Waldman, Y.-L. Zhong, M. Shevlin, F. Peng, General  
573 Principles and Strategies for Salting-Out Informed by the Hofmeister Series. *Org. Process*  
574 *Res. Dev.* **21**, 1355–1370 (2017).
- 575 12.J. E. Hallsworth, S. Heim, K. N. Timmis, Chaotropic solutes cause water stress in  
576 *Pseudomonas putida*. *Environmental microbiology* **5**, 1270–1280 (2003).
- 577 13.J. Heinz, V. Rambags, D. Schulze-Makuch, Physicochemical Parameters Limiting Growth of  
578 *Debaryomyces hansenii* in Solutions of Hygroscopic Compounds and Their Effects on the  
579 Habitability of Martian Brines. *Life (Basel, Switzerland)* **11** (2021).
- 580 14.J. Heinz, T. Krahn, D. Schulze-Makuch, A New Record for Microbial Perchlorate Tolerance:  
581 Fungal Growth in NaClO<sub>4</sub> Brines and its Implications for Putative Life on Mars. *Life (Basel,*  
582 *Switzerland)* **10**, 53 (2020).
- 583 15.C. Prista, C. Michán, I. M. Miranda, J. Ramos, The halotolerant *Debaryomyces hansenii*, the  
584 Cinderella of non-conventional yeasts. *Yeast* **33**, 523–533 (2016).
- 585 16.J. Doellinger, C. Blumenschein, A. Schneider, P. Lasch, Isolation Window Optimization of  
586 Data-Independent Acquisition Using Predicted Libraries for Deep and Accurate Proteome  
587 Profiling. *Analytical chemistry* **92**, 12185–12192 (2020).
- 588 17.J. Doellinger, A. Schneider, M. Hoeller, P. Lasch, Sample Preparation by Easy Extraction and  
589 Digestion (SPEED) - A Universal, Rapid, and Detergent-free Protocol for Proteomics Based  
590 on Acid Extraction. *Molecular & cellular proteomics : MCP* **19**, 209–222 (2020).
- 591 18.D. Szklarczyk, A. L. Gable, K. C. Nastou, D. Lyon, R. Kirsch, S. Pyysalo, N. T. Doncheva, M.  
592 Legeay, T. Fang, P. Bork, L. J. Jensen, C. von Mering, The STRING database in 2021:



- 593 customizable protein-protein networks, and functional characterization of user-uploaded  
594 gene/measurement sets. *Nucleic acids research* **49**, D605-D612 (2021).
- 595 19.S. Hohmann, Osmotic stress signaling and osmoadaptation in yeasts. *Microbiology and*  
596 *molecular biology reviews : MMBR* **66**, 300–372 (2002).
- 597 20.P. Sharma, N. Meena, M. Aggarwal, A. K. Mondal, *Debaryomyces hansenii*, a highly osmo-  
598 tolerant and halo-tolerant yeast, maintains activated Dhog1p in the cytoplasm during its  
599 growth under severe osmotic stress. *Current genetics* **48**, 162–170 (2005).
- 600 21.J. Samaj, F. Baluska, H. Hirt, From signal to cell polarity: mitogen-activated protein kinases as  
601 sensors and effectors of cytoskeleton dynamicity. *Journal of experimental botany* **55**, 189–198  
602 (2004).
- 603 22.I. M. Joshua, T. Höfken, Ste20 and Cla4 modulate the expression of the glycerol biosynthesis  
604 enzyme Gpd1 by a novel MAPK-independent pathway. *Biochemical and biophysical research*  
605 *communications* **517**, 611–616 (2019).
- 606 23.W. Duntze, D. Neumann, J. M. Gancedo, W. Atzpodien, H. Holzer, Studies on the regulation  
607 and localization of the glyoxylate cycle enzymes in *Saccharomyces cerevisiae*. *European*  
608 *journal of biochemistry* **10**, 83–89 (1969).
- 609 24.U. Breuer, H. Harms, *Debaryomyces hansenii*—an extremophilic yeast with biotechnological  
610 potential. *Yeast* **23**, 415–437 (2006).
- 611 25.U. Petrovic, Role of oxidative stress in the extremely salt-tolerant yeast *Hortaea werneckii*.  
612 *FEMS yeast research* **6**, 816–822 (2006).
- 613 26.B. Schnitzer, N. Welkenhuysen, M. C. Leake, S. Shashkova, M. Cvijovic, The effect of stress  
614 on biophysical characteristics of misfolded protein aggregates in living *Saccharomyces*  
615 *cerevisiae* cells. *Experimental gerontology* **162**, 111755 (2022).
- 616 27.M. P. Jackson, E. W. Hewitt, Cellular proteostasis: degradation of misfolded proteins by  
617 lysosomes. *Essays in biochemistry* **60**, 173–180 (2016).
- 618 28.B. Albert, I. C. Kos-Braun, A. K. Henras, C. Dez, M. P. Rueda, X. Zhang, O. Gadai, M. Kos, D.  
619 Shore, A ribosome assembly stress response regulates transcription to maintain proteome  
620 homeostasis. *eLife* **8** (2019).
- 621 29.D. Shore, S. Zencir, B. Albert, Transcriptional control of ribosome biogenesis in yeast: links to  
622 growth and stress signals. *Biochemical Society transactions* **49**, 1589–1599 (2021).

- 623 30.M. D. Jacobsen, R. J. Beynon, L. A. Gethings, A. J. Claydon, J. I. Langridge, J. P. C. Vissers,  
624 A. J. P. Brown, D. E. Hammond, Specificity of the osmotic stress response in *Candida*  
625 *albicans* highlighted by quantitative proteomics. *Scientific reports* **8**, 14492 (2018).
- 626 31.M. C. Kiel, H. Kaji, A. Kaji, Ribosome recycling: An essential process of protein synthesis.  
627 *Biochemistry and molecular biology education : a bimonthly publication of the International*  
628 *Union of Biochemistry and Molecular Biology* **35**, 40–44 (2007).
- 629 32.C. Mayer, I. Grummt, Ribosome biogenesis and cell growth: mTOR coordinates transcription  
630 by all three classes of nuclear RNA polymerases. *Oncogene* **25**, 6384–6391 (2006).
- 631 33.K. K. Steffen, V. L. MacKay, E. O. Kerr, M. Tsuchiya, Di Hu, L. A. Fox, N. Dang, E. D.  
632 Johnston, J. A. Oakes, B. N. Tchao, D. N. Pak, S. Fields, B. K. Kennedy, M. Kaeberlein, Yeast  
633 life span extension by depletion of 60s ribosomal subunits is mediated by Gcn4. *Cell* **133**,  
634 292–302 (2008).
- 635 34.T. Jordá, S. Puig, Regulation of Ergosterol Biosynthesis in *Saccharomyces cerevisiae*. *Genes*  
636 **11** (2020).
- 637 35.F. M. Montañés, A. Pascual-Ahuir, M. Proft, Repression of ergosterol biosynthesis is essential  
638 for stress resistance and is mediated by the Hog1 MAP kinase and the Mot3 and Rox1  
639 transcription factors. *Molecular microbiology* **79**, 1008–1023 (2011).
- 640 36.Z. Hu, B. He, L. Ma, Y. Sun, Y. Niu, B. Zeng, Recent Advances in Ergosterol Biosynthesis and  
641 Regulation Mechanisms in *Saccharomyces cerevisiae*. *Indian journal of microbiology* **57**, 270–  
642 277 (2017).
- 643 37.G. Salvi, P. de Los Rios, M. Vendruscolo, Effective interactions between chaotropic agents  
644 and proteins. *Proteins* **61**, 492–499 (2005).
- 645 38.J. P. Williams, J. E. Hallsworth, Limits of life in hostile environments: no barriers to biosphere  
646 function? *Environmental microbiology* **11**, 3292–3308 (2009).
- 647 39.G. Lesage, H. Bussey, Cell wall assembly in *Saccharomyces cerevisiae*. *Microbiology and*  
648 *molecular biology reviews : MMBR* **70**, 317–343 (2006).
- 649 40.H. E. Brown, S. K. Esher, J. A. Alspaugh, Chitin: A "Hidden Figure" in the Fungal Cell Wall.  
650 *Current topics in microbiology and immunology* **425**, 83–111 (2020).
- 651 41.L. M. Douglas, F. J. Alvarez, C. McCreary, J. B. Konopka, Septin function in yeast model  
652 systems and pathogenic fungi. *Eukaryotic cell* **4**, 1503–1512 (2005).

- 653 42.D. Shental-Bechor, Y. Levy, Effect of glycosylation on protein folding: a close look at  
654 thermodynamic stabilization. *Proceedings of the National Academy of Sciences of the United*  
655 *States of America* **105**, 8256–8261 (2008).
- 656 43.G. Kern, N. Schülke, F. X. Schmid, R. Jaenicke, Stability, quaternary structure, and folding of  
657 internal, external, and core-glycosylated invertase from yeast. *Protein science : a publication*  
658 *of the Protein Society* **1**, 120–131 (1992).
- 659 44.M. Gentsch, W. Tanner, Protein-O-glycosylation in yeast: protein-specific  
660 mannosyltransferases. *Glycobiology* **7**, 481–486 (1997).
- 661 45.C. R. Hamiel, S. Pinto, A. Hau, P. E. Wischmeyer, Glutamine enhances heat shock protein 70  
662 expression via increased hexosamine biosynthetic pathway activity. *American journal of*  
663 *physiology. Cell physiology* **297**, C1509-19 (2009).
- 664 46.M. Trautwein, C. Schindler, R. Gauss, J. Dengjel, E. Hartmann, A. Spang, Arf1p, Chs5p and  
665 the ChAPs are required for export of specialized cargo from the Golgi. *The EMBO journal* **25**,  
666 943–954 (2006).
- 667 47.E. Cabib, N. Blanco, C. Grau, J. M. Rodríguez-Peña, J. Arroyo, Crh1p and Crh2p are required  
668 for the cross-linking of chitin to beta(1-6)glucan in the *Saccharomyces cerevisiae* cell wall.  
669 *Molecular microbiology* **63**, 921–935 (2007).
- 670 48.H. T. Taff, J. E. Nett, R. Zarnowski, K. M. Ross, H. Sanchez, M. T. Cain, J. Hamaker, A. P.  
671 Mitchell, D. R. Andes, A *Candida* biofilm-induced pathway for matrix glucan delivery:  
672 implications for drug resistance. *PLoS pathogens* **8**, e1002848 (2012).
- 673 49.K. Beblo-Vranesevic, H. Huber, P. Rettberg, High Tolerance of *Hydrogenothermus marinus* to  
674 Sodium Perchlorate. *Frontiers in microbiology* **8**, 1369 (2017).
- 675 50.J. Heinz, A. C. Waajen, A. Airo, A. Alibrandi, J. Schirmack, D. Schulze-Makuch, Bacterial  
676 Growth in Chloride and Perchlorate Brines: Halotolerances and Salt Stress Responses of  
677 *Planococcus halocryophilus*. *Astrobiology* **19**, 1377–1387 (2019).
- 678 51.T. Suhm, J. M. Kaimal, H. Dawitz, C. Peselj, A. E. Masser, S. Hanzén, M. Ambrožič, A.  
679 Smialowska, M. L. Björck, P. Brzezinski, T. Nyström, S. Büttner, C. Andréasson, M. Ott,  
680 Mitochondrial Translation Efficiency Controls Cytoplasmic Protein Homeostasis. *Cell*  
681 *metabolism* **27**, 1309-1322.e6 (2018).
- 682 52.C. Andréasson, M. Ott, S. Büttner, Mitochondria orchestrate proteostatic and metabolic stress  
683 responses. *EMBO reports* **20**, e47865 (2019).

- 684 53.G. Kozlov, K. Gehring, Calnexin cycle - structural features of the ER chaperone system. *The*  
685 *FEBS journal* **287**, 4322–4340 (2020).
- 686 54.H. Guo, S. Damerow, L. Penha, S. Menzies, G. Polanco, H. Zegzouti, M. A. J. Ferguson, S.  
687 M. Beverley, A broadly active fucosyltransferase LmjFUT1 whose mitochondrial localization  
688 and activity are essential in parasitic Leishmania. *Proceedings of the National Academy of*  
689 *Sciences of the United States of America* **118** (2021).
- 690 55.J. Díaz-Rullo, G. Rodríguez-Valdecantos, F. Torres-Rojas, L. Cid, I. T. Vargas, B. González,  
691 J. E. González-Pastor, Mining for Perchlorate Resistance Genes in Microorganisms From  
692 Sediments of a Hypersaline Pond in Atacama Desert, Chile. *Front. Microbiol.* **12**, 723874  
693 (2021).
- 694 56.P. Rzymiski, B. Poniedziałek, N. Hippmann, Ł. Kaczmarek, Screening the Survival of  
695 Cyanobacteria Under Perchlorate Stress. Potential Implications for Mars In Situ Resource  
696 Utilization. *Astrobiology*. 10.1089/ast.2021.0100 (2022).
- 697 57.L. P. Collinson, I. W. Dawes, Isolation, characterization and overexpression of the yeast gene,  
698 GLR1, encoding glutathione reductase. *Gene* **156**, 123–127 (1995).
- 699 58.X. Zhao, P. Zhou, X. Chen, X. Li, L. Ding, Perchlorate-induced oxidative stress in isolated liver  
700 mitochondria. *Ecotoxicology (London, England)* **23**, 1846–1853 (2014).
- 701 59.X.-H. Zhao, P.-J. Zhou, X. Chen, Y.-L. Dong, S.-Y. Jiang, L. Ding, Microcalorimetric studies of  
702 perchlorate on heat production by hepatocytes and mitochondria isolated from *Carassius*  
703 *auratus*. *Chemosphere* **83**, 422–428 (2011).
- 704 60.E. T. Urbansky, Perchlorate Chemistry: Implications for Analysis and Remediation.  
705 *Bioremediation Journal* **2**, 81–95 (1998).
- 706 61.C. Ren, J. Liu, Bioinspired Catalytic Reduction of Aqueous Perchlorate by One Single-Metal  
707 Site with High Stability against Oxidative Deactivation. *ACS Catal.* **11**, 6715–6725 (2021).
- 708 62.P. Hu, H. Ding, L. Shen, G.-J. He, H. Liu, X. Tian, C. Tao, X. Bai, J. Liang, C. Jin, X. Xu, E.  
709 Yang, L. Wang, A unique cell wall synthetic response evoked by glucosamine determines  
710 pathogenicity-associated fungal cellular differentiation. *PLoS genetics* **17**, e1009817 (2021).
- 711 63.M. H. Hecht, S. P. Kounaves, R. C. Quinn, S. J. West, Young, S M M, D. W. Ming, D. C.  
712 Catling, B. C. Clark, W. V. Boynton, J. Hoffman, L. P. Deflores, K. Gospodinova, J. Kapit, P.  
713 H. Smith, Detection of perchlorate and the soluble chemistry of martian soil at the Phoenix  
714 lander site. *Science (New York, N.Y.)* **325**, 64–67 (2009).

- 715 64.S. E. Lauro, E. Pettinelli, G. Caprarelli, L. Guallini, A. P. Rossi, E. Mattei, B. Cosciotti, A.  
716 Cicchetti, F. Soldovieri, M. Cartacci, F. Di Paolo, R. Noschese, R. Orosei, Multiple subglacial  
717 water bodies below the south pole of Mars unveiled by new MARSIS data. *Nat Astron* **5**, 63–  
718 70 (2021).
- 719 65.D. Billi, B. Gallego Fernandez, C. Fagliarone, S. Chiavarini, L. J. Rothschild, Exploiting a  
720 perchlorate-tolerant desert cyanobacterium to support bacterial growth for in situ resource  
721 utilization on Mars. *Int.Jnl Astrobiol.* **20**, 29–35 (2021).
- 722 66.J. Zajc, S. Džeroski, D. Kocev, A. Oren, S. Sonjak, R. Tkavc, N. Gunde-Cimerman, Chaophilic  
723 or chaotolerant fungi: a new category of extremophiles? *Frontiers in microbiology* **5**, 708  
724 (2014).
- 725 67.S. Gault, M. W. Jaworek, R. Winter, C. S. Cockell, Perchlorate salts confer psychrophilic  
726 characteristics in  $\alpha$ -chymotrypsin. *Scientific reports* **11**, 16523 (2021).
- 727 68.R. C. Quinn, H. F. H. Martucci, S. R. Miller, C. E. Bryson, F. J. Grunthaner, P. J. Grunthaner,  
728 Perchlorate radiolysis on Mars and the origin of martian soil reactivity. *Astrobiology* **13**, 515–  
729 520 (2013).
- 730 69.UniProt Consortium, UniProt: a worldwide hub of protein knowledge. *Nucleic acids research*  
731 **47**, D506-D515 (2019).
- 732 70.S. Gessulat, T. Schmidt, D. P. Zolg, P. Samaras, K. Schnatbaum, J. Zerweck, T. Knaute, J.  
733 Rechenberger, B. Delanghe, A. Huhmer, U. Reimer, H.-C. Ehrlich, S. Aiche, B. Kuster, M.  
734 Wilhelm, Prosit: proteome-wide prediction of peptide tandem mass spectra by deep learning.  
735 *Nature methods* **16**, 509–518 (2019).
- 736 71.B. C. Searle, L. K. Pino, J. D. Egertson, Y. S. Ting, R. T. Lawrence, B. X. MacLean, J. Villén,  
737 M. J. MacCoss, Chromatogram libraries improve peptide detection and quantification by data  
738 independent acquisition mass spectrometry. *Nature communications* **9**, 5128 (2018).
- 739 72.S. Tyanova, T. Temu, P. Sinitcyn, A. Carlson, M. Y. Hein, T. Geiger, M. Mann, J. Cox, The  
740 Perseus computational platform for comprehensive analysis of (prote)omics data. *Nature*  
741 *methods* **13**, 731–740 (2016).
- 742 73.Y. Perez-Riverol, J. Bai, C. Bandla, D. García-Seisdedos, S. Hewapathirana, S.  
743 Kamatchinathan, D. J. Kundu, A. Prakash, A. Frericks-Zipper, M. Eisenacher, M. Walzer, S.  
744 Wang, A. Brazma, J. A. Vizcaíno, The PRIDE database resources in 2022: a hub for mass  
745 spectrometry-based proteomics evidences. *Nucleic acids research* **50**, D543-D552 (2022).
